1 **Incidence, symptoms and medical care for influenza virus and respiratory syncytial virus**  
2 **illnesses among older adults in Eastern China: Findings from the China Ageing**  
3 **Respiratory Infections Study (CARES), 2015-2017**

4 Nancy H. L. Leung<sup>1,2\*</sup>, Hongjun Zhang<sup>3\*</sup>, Jun Zhang<sup>4\*</sup>, Fenyang Tang<sup>5</sup>, Lin Luan<sup>4</sup>, Benfeng  
5 Zheng<sup>4</sup>, Guoqing Chen<sup>3</sup>, Changcheng Li<sup>3</sup>, Qigang Dai<sup>5</sup>, Cuiling Xu<sup>1,6</sup>, Yuyun Chen<sup>1</sup>, Daniel K.  
6 W. Chu<sup>1</sup>, Ying Song<sup>7</sup>, Ran Zhang<sup>7</sup>, Lindsay Kim<sup>7,8</sup>, Rachael Wendlandt<sup>9</sup>, Huachen Zhu<sup>1,10</sup>, Fiona  
7 Havers<sup>7,8</sup>, Hongjie Yu<sup>11</sup>, Pat Shifflett<sup>9</sup>, Carolyn M. Greene<sup>7</sup>, Benjamin J. Cowling<sup>1,2^†</sup>, Mark G.  
8 Thompson<sup>7†</sup>, A. Danielle Iuliano<sup>7,8†</sup> on behalf of the China Ageing Respiratory Infections Study  
9 (CARES) investigators#

10

11 \* joint first authors, ^ corresponding author, † joint senior authors

12

13 **Affiliations:**

14 1. WHO Collaborating Centre for Infectious Disease Epidemiology and Control, School of  
15 Public Health, Li Ka Shing Faculty of Medicine, The University of Hong Kong, Hong Kong  
16 Special Administrative Region, China.

17 2. Laboratory of Data Discovery for Health, Hong Kong Science and Technology Park, New  
18 Territories, Hong Kong Special Administrative Region, China.

19 3. Yancheng Center for Disease Prevention and Control, Yancheng, China.

20 4. Suzhou Center for Disease Prevention and Control, Suzhou, China.

21 5. Jiangsu Provincial Center for Disease Prevention and Control, Nanjing, China.

22 6. Chinese National Influenza Center, National Institute for Viral Disease Control and  
23 Prevention, Chinese Center for Disease Control and Prevention, Beijing, China.

- 24 7. Centers for Disease Control and Prevention, Atlanta, GA, USA.  
25 8. US Public Health Service, Rockville, MD, USA.  
26 9. Abt Associates, Cambridge, MA, USA.  
27 10. Joint Institute of Virology (Shantou University / The University of Hong Kong) &  
28 Guangdong-Hongkong Joint Laboratory of Emerging Infectious Diseases, Shantou University,  
29 Shantou, China.  
30 11. School of Public Health, Fudan University, Key Laboratory of Public Health Safety, Ministry  
31 of Education, Shanghai, China.

32

33 **Corresponding author:**

34 Prof. Benjamin J. Cowling, School of Public Health, The University of Hong Kong, 7 Sassoon  
35 Road, Pokfulam, Hong Kong Special Administrative Region, China.  
36 Tel: +852 3917 6711. Email: [bcowling@hku.hk](mailto:bcowling@hku.hk).

37

38 # The CARES investigators are listed in the Acknowledgments

39

40 Word count (Abstract): 250 (limit: 250)

41 Word count (Main text): 3492, 30 refs (limit: 3500, 30 refs)

42

43 Running head: Influenza and RSV in older adults in Eastern China

44

45 Key words: influenza virus; respiratory syncytial virus; older adults; incidence; hospitalization;  
46 cohort studies; disease burden.

47 **SUMMARY (250 words)**

48 **Introduction:** Few studies have examined the incidence of virologic-confirmed influenza virus  
49 and respiratory syncytial virus (RSV) infections in community-dwelling older adults.

50 **Methods:** We enrolled adults aged 60–89 years in Jiangsu Province, China and followed them  
51 weekly from December 2015–September 2017 to identify acute respiratory illnesses (ARI),  
52 collect illness information and respiratory specimens for laboratory testing.

53 **Results:** 1,527 adults were enrolled, 0·4% reported ever receiving influenza vaccination. 95  
54 PCR-confirmed influenza ARIs and 22 RSV ARIs were identified, among whom 4–5% required  
55 hospitalization. One death associated with RSV ARI while none for influenza ARIs was  
56 observed. From December 2015-August 2016, the cumulative incidences of influenza and RSV  
57 ARIs were 0·8% (95% CI:0·3–1·4) and 0·5% (95% CI:0·1–1·0), respectively. From September  
58 2016-August 2017, the cumulative incidences were 6·1% (95% CI:4·7–7·7) and 1·0% (95%  
59 CI:0·5–1·6); the influenza and RSV ARI-associated hospitalization incidences were 0·3% (95%  
60 CI:0–0·8) and 0·1% (95% CI:0–0·2). Feverishness was more common in influenza (55%) than  
61 RSV ARIs (30%,  $p=0\cdot03$ ). Influenza (12·5 days,  $p=0\cdot02$ ) and RSV ARI symptoms (14·1 days,  
62  $p=0\cdot15$ ) lasted longer compared to PCR-negative/other ARIs (11·0 days). Antibiotic use was  
63 more common for influenza (65%,  $p=0\cdot02$ ) and RSV (70%,  $p=0\cdot04$ ) ARIs than other ARIs  
64 (51%).

65 **Conclusions:** We observed a higher incidence of influenza relative to RSV infections among  
66 community-dwelling older adults compared to prior studies. Our findings suggest older adults  
67 may benefit from receiving influenza and RSV vaccines to reduce the occurrence of illnesses.

68

## 69 INTRODUCTION

70 Respiratory virus infections like influenza virus and respiratory syncytial virus (RSV) are major  
71 causes of acute hospitalizations and deaths. In temperate climates infections occur mainly during  
72 winter, where in tropical and subtropical climates infections may occur year-round.<sup>1</sup> In older  
73 adults, while the potential severity of influenza illness is commonly known,<sup>2</sup> studies suggested  
74 RSV severity may be similar or greater than influenza.<sup>3</sup> The World Health Organization  
75 recommends prioritizing older adults to receive influenza vaccination but uptake remains low in  
76 many locations.<sup>4</sup> More recently RSV vaccines for older adults were approved in some countries.<sup>5</sup>  
77  
78 Vaccination policies require knowledge of influenza and RSV disease burden. Community-based  
79 cohort studies<sup>6-10</sup> can actively identify respiratory illnesses not captured by routine health  
80 systems. However, most of these studies have been conducted in households with children<sup>6,11-13</sup>  
81 and in high-income countries.<sup>14</sup> Fewer were among older adults<sup>15,16</sup> including those aged  $\geq 80$   
82 years, a group vulnerable to severe complications from these infections,<sup>14</sup> and in low-and-middle  
83 income countries.<sup>12,16-18</sup> To address this gap, we established a community cohort of older adults  
84 in Jiangsu Province, China to characterize the incidence, symptom profiles, and medical care of  
85 PCR-confirmed influenza virus and RSV illnesses from December 2015–September 2017.<sup>19</sup>

## 87 METHODS

### 88 *Study design*

89 We monitored respiratory illnesses in a prospective longitudinal cohort of older adults aged 60–  
90 89 years in Jiangsu Province, China (**Figure 1A**) from December 2015–September 2017 (**Figure**  
91 **1B**). A detailed cohort description was previously published.<sup>19</sup> In brief, we screened and enrolled

92 older adults in New District and Xiangcheng in Suzhou and Economic Development Zone (EDZ)  
93 and Tinghu in Yancheng, representing urban and semi-urban areas with different socio-economic  
94 development levels in eastern China. We recruited older adults in three age groups (60–69, 70–  
95 79, and 80–89 years old) with oversampling among those aged 80–89 years. At enrolment, we  
96 collected information on demographics, household size, influenza vaccination history, smoking  
97 status, medical history, cognitive functioning, and self-rated health and functioning.<sup>20</sup> For  
98 cognitive functioning, two measures were used: the Mini-Cog (3-item recall) and Standardized  
99 Mini-Mental State Examination (SMMSE).<sup>21,22</sup>

100  
101 We conducted year-round active surveillance for acute respiratory illness (ARI) (**Appendix**  
102 **Methods**) because influenza viruses are known to circulate beyond the typical winter months in  
103 eastern China, and we expect RSV to circulate mostly in winter seasons.<sup>1,23</sup> During weekly  
104 telephone calls, we asked if the participant was experiencing respiratory symptoms. Illness  
105 episodes with onset  $\geq 14$  days apart were considered separate episodes. Home visits were  
106 arranged for new ARI episodes to collect respiratory specimens (combined mid-turbinate and  
107 oropharyngeal swabs) within 7 days of symptom onset for laboratory confirmation of infections;  
108 study staff also administered an acute illness questionnaire that recorded illness symptoms and  
109 whether medical care was sought. Ten days after illness onset, a follow-up questionnaire on  
110 illness outcome was completed by telephone. Respiratory specimens were placed in coolers at 2–  
111 8°C and transported to the Suzhou Center for Disease Prevention and Control (CDC) or  
112 Yancheng CDC laboratories within 24 hours of collection. Specimens were then stored at -80°C  
113 until testing.<sup>19</sup>

114

115 *Ethical approval*

116 Written informed consent was obtained from participants. The study was approved by the  
117 Institutional Review Board of the University of Hong Kong (UW15 404), the Institutional  
118 Review Board of Abt Associates (Abt IRB # 0837) upon which United States CDC relied, and  
119 the Ethics Committee of Jiangsu Provincial CDC (JSJK2015-B013-02).

120

121 *Laboratory testing*

122 Respiratory specimens were tested for influenza viruses and RSV by real-time reverse  
123 transcription-polymerase chain reaction (PCR) using United States CDC primers, probes,  
124 reagents, and protocols.<sup>19</sup>

125

126 *Primary outcomes and statistical analyses*

127 We measured the cumulative incidence of symptomatic PCR-confirmed influenza virus and RSV  
128 infections using the following illness definitions and outcomes: ARI, influenza-like illness (ILI),  
129 medically attended ARI, ARI-associated hospitalization, and ARI-associated death (**Appendix**  
130 **Table 1**). An ARI was defined as  $\geq 2$  of the following signs or symptoms with onset in the past 7  
131 days: fever (self-reported feverishness, chills, or temperature  $\geq 37.8^{\circ}\text{C}$ ), cough, sore throat, runny  
132 nose or nasal congestion, headache, myalgia (body or muscle aches and pain), or worsened  
133 shortness of breath. To compare with prior studies, we examined a subset of ARI as ILI defined  
134 as self-reported fever  $\geq 37.8^{\circ}\text{C}$  plus cough with onset in the past 7 days. A medically attended  
135 ARI was defined as an ARI with a self-reported visit to a doctor or other medical professional  
136 during the acute illness, including visits to outpatient medical clinic/offices, emergency rooms,  
137 or hospitals. An ARI-associated hospitalization was defined as a self-reported hospitalization

138 (i.e., overnight stay in hospital) during the ARI episode. An ARI-associated death was a death  
139 that occurred within 14 days of respiratory illness onset. A PCR-positive respiratory specimen  
140 indicated a virologic-confirmed influenza virus or RSV infection.

141  
142 We defined the cumulative incidence of influenza or RSV ARI as the proportion of participants  
143 with PCR-confirmed influenza virus or RSV infections among participants enrolled at the start of  
144 each study year. Study Year 1 was a partial season capturing information from 27 December  
145 2015 through 3 September 2016, and Year 2 was a complete season from 4 September 2016  
146 through 2 September 2017. From previous studies, we anticipated an annual cumulative  
147 incidence of influenza ARI of 2–4% in older adults.<sup>12,17</sup> A sample size of 1,500 participants  
148 permitted estimating a cumulative incidence of influenza ARI of 2% with  $\pm 0.7\%$  margin of  
149 error.<sup>19</sup> We estimated the cumulative and weekly incidence for each age group, and calculated  
150 all-age estimates weighted with the population age and sex structure of Jiangsu Province  
151 (**Appendix Figure 1**). We estimated 95% confidence intervals (95% CIs) for the cumulative and  
152 weekly incidence using a bootstrap with 2,000 resamples.<sup>24</sup> If there were no illness outcomes  
153 observed during a surveillance week, the point estimate and uncertainty for the true incidence  
154 was represented as 0 (0, 3/n) where n was the number of participants followed.<sup>24</sup>

155  
156 Subjective severity of illness was measured in three ways using previously published  
157 methods.<sup>25,26</sup> First, participants rated the severity of each symptom as absent, mild, moderate, or  
158 severe (0–3, respectively), and then a mean symptom severity score (1-3) was calculated.  
159 Second, self-rated overall health during the illness was rated from 0 (worst) to 100 (best health  
160 state). Third, the ability to complete regular activities were rated from 0% (unable) to 100% (able

161 to do all activities and responsibilities). Illness duration was defined as the number of days  
162 between dates for ARI symptoms onset and resolution with both dates inclusive. We compared  
163 illness characteristics of ARI episodes with PCR-confirmed influenza ('influenza ARI') or RSV  
164 infections ('RSV ARI'), with ARI episodes that were influenza and RSV PCR-negative  
165 (henceforth PCR-negatives). We used Student's t-test for comparison of severity scores and  
166 durations, and Fisher's exact test for cognitive functioning, symptoms and medical care.  
167 Analyses were done using R version 4.3.1 (R Foundation for Statistical Computing, Vienna,  
168 Austria), and geospatial data from the Global Administrative Areas (GADM) database version  
169 2.8.<sup>27</sup>

170

#### 171 *Role of the funding source*

172 This study was financially supported by the US Centers for Disease Control and Prevention  
173 through a contract (HHSD2002013M53890B: 200-2014-F-60406 to Abt Associates, Inc.), and a  
174 cooperative agreement (grant no. 1U01IP001064).

175

## 176 **RESULTS**

177 We approached 2,280 older adults and screened 1,914 (84%). Of those, 1,573/1,914 (82%) met  
178 inclusion criteria, 1,532/1,573 (97%) were enrolled, and 1,527/1,532 (97%) initiated acute  
179 respiratory illness surveillance.<sup>19</sup> As planned, distribution across participant age groups was  
180 similar: 60-69 years (n=547, 36%), 70-79 years (515, 34%), and 80-89 years (465, 30%) (**Table**  
181 **1**). Most participants lived in urban (24%) or semi-urban (43%) areas and had no formal  
182 education (51%) or only attended primary school (34%). At enrollment, most participants  
183 described overall health status as excellent, very good, or good (59%) compared with fair or poor



184 (40%). Sixty-nine percent of participants self-reported  $\geq 1$  chronic health condition and 15%  
185 reported hospitalization in the past two years. Assessing cognitive function, almost all  
186 participants (98%) recalled three items, with the remaining recalling 1-2 items and having the  
187 ability to complete a clock drawing test.

188  
189 From 27 December 2015—2 September 2017, 1,337/1,527 (88%) participants completed active  
190 surveillance follow-up. Among the 190 (12%) lost to follow-up, 84 (44%) died, 7 (4%) withdrew  
191 due to deteriorating health and 81 (43%) withdrew for other reasons (**Appendix Table 2**).

192 Approximately 30% of follow-up contacts to participants were through a proxy who had daily  
193 interaction with the participant. From 29,551 and 29,822 successful contact person-weeks  
194 reported from New District and Xiangcheng in Suzhou, and 20,036 and 41,075 person-weeks  
195 from EDZ and Tinghu in Yancheng respectively (**Appendix Tables 3 – 6**), were identified 1,043  
196 episodes of acute illness, of which 898 (86%) reported by 522 participants met the ARI  
197 definition. We collected respiratory specimens for 840 (94%) ARI episodes, 95 (11%) were  
198 PCR-confirmed influenza virus infections (“influenza ARI”) and 22 (3%) were RSV infections  
199 (“RSV ARI”), including 4 co-infections. Two participants (0.1%) had two separate influenza  
200 ARIs (**Table 2**). We identified 56 (59%) influenza and 16 (73%) RSV ARIs from December—  
201 February, compared with 12 (13%) and none during June—September (**Figure 1C**). The  
202 temporal pattern of influenza detections in our cohort was consistent with community  
203 surveillance data over the same period (**Appendix Figure 2**). There were 26 (1.7%) ARI-  
204 associated hospitalizations; four were influenza ARIs and one was an RSV ARI (**Table 2**). One  
205 death associated with RSV ARI was observed and zero for influenza ARI (**Table 2**).

206

207 Of the 95 influenza virus infections, 86 were influenza A, 8 were influenza B, and one was a co-  
208 infection with influenza A and B viruses. Influenza A subtyping was completed for 63  
209 specimens; 9 (14%) were A(H1N1) and 54 (86%) were A(H3N2). Twenty-three specimens were  
210 not subtyped due to high PCR cycle thresholds. Four influenza B viruses were B/Victoria, three  
211 were B/Yamagata, and two were untyped. The most commonly detected virus in Year 1 was  
212 A(H1N1) and in Year 2 was A(H3N2) (**Appendix Figure 2**).

213  
214 We estimated the cumulative incidence (**Table 3**) and incidence rate (**Appendix Table 7**) by age  
215 group, and weighted overall estimate, of PCR-confirmed influenza ARI or RSV ARI in each  
216 study year. In Year 1, the overall age-weighted incidence of influenza ARI among older adults  
217  $\geq 60$  years was 0.8% (95% CI:0.3–1.4), and that of influenza ARI-associated hospitalizations  
218 was 0.1% (95% CI:0–0.3). In Year 2, the age-weighted influenza ARI and influenza ARI-  
219 associated hospitalization incidences were 6.1% (95% CI:4.7–7.7) and 0.3% (95% CI:0–0.8)  
220 respectively. For RSV, in Year 1 the overall age-weighted incidence of RSV ARI was 0.5%  
221 (95% CI:0.1–1.0), with no hospitalizations observed. In Year 2, the age-weighted RSV ARI and  
222 RSV ARI-associated incidences were 1.0% (95% CI:0.5–1.6) and 0.1% (95% 0–0.2)  
223 respectively. Significant differences between age groups were not observed (**Appendix Figure**  
224 **3**).

225  
226 Acute illness surveys were completed for 822 (92%) ARI episodes from 487 participants.  
227 Comparing ARIs of different virus aetiologies (**Table 4, Figure 2, Appendix Figure 4**),  
228 subjective feverishness was more common in influenza ARI (55%) compared to RSV ARI (30%,  
229  $p=0.03$ ) or PCR-negatives (44%,  $p=0.04$ ). Influenza ARIs met the ILI case definition (24%,

230  $p=0.04$ ) significantly more often than PCR-negative ARIs (16%), but not statistically different  
231 for RSV ARIs (15%). The sensitivity of the ILI case definition for influenza ARI detection was  
232 24% (95% CI: 15%, 34%) and 15% (95% CI: 3%, 38%) for RSV ARIs; the specificity was 83%  
233 (95% CI: 81%, 87%) and 83% (95% CI: 80%, 86%), respectively. Older adults with influenza  
234 ARI reported higher symptom severity scores for subjective fever (**Appendix Table 8**) and  
235 worsened shortness of breath (**Appendix Table 9**). There were no differences in symptom  
236 severity scores by upper respiratory, lower respiratory, or systemic symptom categories. The  
237 mean ratings for overall health or ability to do normal activities during the illness were also  
238 similar across aetiologies (**Table 4**). Illness duration for an influenza ARI (12.5 days, 95% CI:  
239 11.4, 13.8) was similar to RSV ARI (14.1 days, 95% CI: 10.9, 18.2), but statistically longer  
240 ( $p=0.02$ ) than PCR-negative ARIs (11.0 days, 95% CI: 10.7, 11.3). The number of days spent in  
241 bed for influenza ARI (1.2 days, 95% CI: 0.8, 1.7) was also similar to RSV ARI (1.4 days, 95%  
242 CI: 0.5, 2.4), but statistically more ( $p=0.04$ ) than PCR-negative ARIs (0.7 days, 95% CI: 0.6,  
243 0.8).

244  
245 Participants sought medical attention in 67% (549/822) of ARI episodes (**Table 4**). Ambulatory  
246 care (outpatient care or visit to an emergency room) was common for both influenza and RSV  
247 ARIs, with outpatient care statistically more likely for influenza ARI (80%) compared to RSV  
248 ARI (50%,  $p=0.01$ ) or PCR-negative ARI (62%,  $p\leq 0.001$ ). Participants with influenza ARIs  
249 (4.3%,  $p=0.28$ ) and RSV ARIs (5.0%,  $p=0.32$ ) were hospitalized more frequently than those  
250 with PCR-negative ARIs (2.4%) although the difference was not significant. ARI episodes were  
251 classified by the highest level of care obtained, the level of care differed significantly by age  
252 groups for influenza ARI ( $p=0.05$ ) and PCR-negative ARI ( $p=0.03$ ) (**Appendix Table 10**), with

253 a trend of less hospitalizations in older age groups for influenza ARI and a reverse trend for  
254 PCR-negative ARI (**Appendix Figure 5**).

255  
256 Among all ARIs, 71% reported using any medication, with significantly higher use among  
257 influenza ARI (84%) than other ARI (**Table 4**). Antibiotic use was reported in 53% of all ARI  
258 episodes, with significantly higher use among influenza ARIs (65%) and RSV ARIs (70%) than  
259 PCR-negative ARIs (51%).

260

## 261 **DISCUSSION**

262 We estimated the incidence of influenza and RSV ARI, described symptom profiles, and medical  
263 care seeking behavior in >1,500 older adults in eastern China between 2015–2017. This was one  
264 of the largest prospective observational studies to actively identify laboratory-confirmed  
265 influenza and RSV illnesses in older adults. We observed a higher incidence (6·1%) of PCR-  
266 confirmed influenza ARI in 2016–17 (study year 2) when circulation of influenza A(H3N2) virus  
267 predominated; and a lower incidence (0·8%) in 2015–16 (year 1), based on only a partial study  
268 year of active surveillance when circulation of influenza A(H1N1) virus predominated. We  
269 estimated PCR-confirmed RSV ARI incidence ranged from 0·5–1·0% in both study years. While  
270 our study was not powered to estimate hospitalization incidences, our findings suggested  
271 cumulative incidences of 0·1–0·3% and 0–0·1% for hospitalization during acute influenza ARI  
272 and RSV ARI, respectively in community-dwelling older adults  $\geq 60$  years; and no  
273 hospitalizations were observed in those  $\geq 80$  years for either influenza or RSV ARI in our cohort.  
274 Understanding the effect of influenza virus and RSV infections on older adults provides an  
275 evidence base to inform prevention and control measures, including vaccine programs.

276  
277 Community-based studies of influenza incidence have mostly focused on all ages<sup>12,17,18</sup> and few  
278 focus on older adults specifically.<sup>15</sup> Tinoco et al. identified ILI, defined as fever or feverishness  
279 plus cough or sore throat, by three times weekly home visits in about 500 older adults  $\geq 65$  years  
280 old from four sites in Peru between 2009–15, with reported influenza vaccination coverage of 26  
281 per 100 person-years.<sup>17</sup> Prasert et al. identified ARI, defined as new onset of cough or worsening  
282 of chronic cough regardless of fever, by weekly calls or home visits in about 1,500 unvaccinated  
283 adults  $\geq 65$  years in a prospective observational cohort on influenza vaccine effectiveness in  
284 Thailand between 2015–17.<sup>15</sup> Cohen et al. identified infection by nasopharyngeal sampling twice  
285 weekly irrespective of symptoms in about 50 older adults  $\geq 65$  years (among 1116 participants of  
286 all ages from 225 households with almost no influenza vaccination) in South Africa between  
287 2016–18.<sup>18</sup> Compared to these unvaccinated populations (except Peru), in our study of 1500  
288 older adults  $\geq 60$  years, the estimated A(H1N1) ARI incidence (of 1.3/100 person-years) in study  
289 year 1 (a partial season) was less than the incidence (based on symptomatic and asymptomatic  
290 infections combined) estimated in South Africa (2.3/100 person-years during 2017–18)<sup>18</sup> and  
291 higher than influenza illness in Thailand ( $< 0.3/100$  person-years in 2015-16 and 2016-17  
292 seasons).<sup>15</sup> In study year 2, our estimated A(H3N2) incidence (of 6.5/100 person-years) was  
293 higher than Peru (3.6/100 person-years)<sup>17</sup> and Thailand ( $< 2/100$  person-years),<sup>15</sup> but lower than  
294 South Africa (13.6/100 person-seasons during 2017–18).<sup>18</sup> Thus, our virologic-confirmed  
295 influenza incidence estimates fell within the range previously described for community-dwelling  
296 older adults, and on the higher end when A(H3N2) viruses predominated. Our study also  
297 provided valuable data on influenza ARI-associated hospitalizations in community-dwelling  
298 older adults aged  $\geq 80$  years, that despite actively identifying ARI we did not observe more

299 influenza ARI- or RSV ARI- associated (acute) hospitalizations in them than those younger  
300 between 60-79 years old, although our study was underpowered to observe statistical differences  
301 between age groups.

302

303 With RSV vaccines now available for older adults, data on RSV incidence in community-  
304 dwelling older adults can inform population impact and models evaluating the potential benefits  
305 of RSV vaccination programs in older adults, although few of these studies exist, particularly  
306 before the COVID-19 pandemic.<sup>6,8,16,28,29</sup> Prior studies identified RSV illness by passive  
307 surveillance only<sup>29</sup> or evaluated incidence based on both virologic and serologic confirmed  
308 infection.<sup>8</sup> Korsten et al. (RESCEU study) assessed annual RSV community burden in about 500  
309 older adults  $\geq 60$  years old from three cities in Europe between 2017–19 by weekly emails or  
310 calls to identify ARI, which was defined as having at least one of the following symptoms:  
311 cough, nasal congestion or discharge, wheezing or shortness of breath.<sup>28</sup> Our study, with active  
312 surveillance in  $>1,500$  older adults, found that 0·5–1% experienced virologic-confirmed RSV  
313 ARI, 0·3–0·6% had medically attended RSV ARI, and 0–0·1% had RSV ARI-associated  
314 hospitalization during 2015–17 in China. In comparison, Korsten et al. reported higher  
315 cumulative incidences of virologic-confirmed RSV ARI (2·1% and 4·9% during 2017-18 and  
316 2018-19 October–May seasons respectively) and medically attended RSV ARI (0·8% and 1·4%  
317 respectively); and even higher estimates if serologic-confirmed infections.<sup>28</sup> Our observed lower  
318 RSV incidences may be due to differences in surveillance methods, laboratory testing, or true  
319 epidemiological variations. Future analyses of our study serum samples<sup>19</sup> could identify  
320 additional RSV infections.

321

322 Our study suggested older adults with influenza ARI had longer illnesses than those with PCR-  
323 negative ARI, consistent with findings in older adults in RESCEU<sup>28</sup> and other working age  
324 adults.<sup>26</sup> We also observed influenza ARI were more likely to include fever compared to PCR-  
325 negative ARI or RSV ARI. More influenza ARI met the ILI case definition; and while the  
326 sensitivity of the ILI definition to detect either influenza (24%) or RSV (15%) ARI was low, it  
327 was relatively higher for influenza ARI, consistent with earlier findings.<sup>10</sup> This finding suggests  
328 the ILI case definition is less effective for identifying RSV in older adults. To capture RSV  
329 burden in community-dwelling older adults through routine public health surveillance systems, a  
330 new syndromic case definition may be needed.

331  
332 Over half of our participants with influenza or RSV ARI sought medical care. We observed  
333 influenza ARI were more likely to require ambulatory care compared to PCR-negative ARI or  
334 RSV ARI, as also reported by Korsten et al.<sup>28</sup> Influenza vaccine coverage was very low (0·4%)  
335 in this population in Jiangsu Province, similar to those in other Chinese cities where influenza  
336 vaccines require out-of-pocket payment. Future studies are needed to assess the potential benefit  
337 of influenza and RSV vaccination on reducing infections and burden on the healthcare system,  
338 and methods that increase influenza vaccine uptake among older adults in China.

339  
340 Antibiotic use in 9% of all ARI and overuse in 31% of influenza ARI was reported in Europe.<sup>28</sup>  
341 Here, antibiotic use was common in all ARI (53%), particularly for influenza (65%) and RSV  
342 (70%) ARI, indicating the broad overuse of antibiotics for non-bacterial infections. Although a  
343 decline of antibiotic consumption in health care settings particularly in community care was  
344 reported in Shandong Province from 2012–17,<sup>30</sup> our study suggested antibiotic overuse was still

345 prevalent in the community, and efforts to promote rational use of antibiotics in primary care  
346 should be reinforced.

347  
348 Our study has several limitations. First, there may have been under-detection of illnesses and  
349 PCR-confirmed infections, especially in the first study year due to influenza virus circulation  
350 before active surveillance began. Second, if a proxy reported on behalf of the participant, some  
351 illness episodes may have been missed. However, proxies likely reported most illness episodes  
352 as they were required to have daily contact with participants. Finally, we evaluated symptoms  
353 and severity within four days of reported illness, potentially missing later-developing symptoms.

354  
355 Despite these limitations, our study has several important public health implications. We found a  
356 higher incidence of PCR-confirmed influenza (mainly from H3N2) in older adults than most  
357 previous studies. When the incidence of influenza ARI increased in study year 2, the burden on  
358 the healthcare system also increased with more medical care-seeking by older adults, reflecting  
359 the effect of seasonal influenza epidemics on healthcare utilisation at the population level. While  
360 some cities provide free influenza vaccination for older adults, it is not included in the national  
361 immunization program in China and most must pay out-of-pocket. Improving prevention  
362 measures such as influenza vaccination in this vulnerable population with extremely low vaccine  
363 uptake can reduce infections and healthcare burden. We estimated the incidence of PCR-  
364 confirmed RSV illness in older adults in both rural and urban settings in China, providing needed  
365 data on RSV infections and burden in older Asian populations to inform the need for RSV  
366 vaccination programs. We observed widespread use of antibiotics for viral infections.

367



368 **CONTRIBUTORS**

369 All authors meet the International Committee of Medical Journal Editors criteria for authorship.  
370 This project is a multi-national collaboration between investigators in the US, Hong Kong, and  
371 mainland China, and has required substantial contributions from the co-investigators. In terms of  
372 the specific contributions, the study protocol was designed by BJC and MGT and drafted by CX.  
373 Substantial input was provided by NHLL, HZ, JZ, FT, LL, BZ, CL, QD, YS, RW, PS, CG, FH,  
374 LK, and ADI on the study design in the planning phase in a series of meetings in the US, Hong  
375 Kong, and mainland China. The study instruments were prepared by NHLL, CX and RW with  
376 input from HZ, JZ, LL, BZ, YC, YS, PS, CG, FH, LK, BJC, MGT and ADI. Study staff training  
377 were designed and performed by NHLL, HZ, LL, BZ, QD, CX, YC, YS, RZ, RW, CG and HY.  
378 Study activities were managed and organized by HZ, JZ, LL, BZ and YC with oversight by  
379 NHLL and BJC. The laboratory tests were developed and performed by GC, DKWC, and HZ.  
380 Statistical analyses were done by NHLL. The initial draft of the present manuscript was prepared  
381 by NHLL and ADI with input from MGT and BJC, and all authors provided critical review and  
382 revision of the text and approved the final version.

383

384 **ACKNOWLEDGMENTS**

385 CARES investigators also include: Vicky J. Fang, Yi Guan, Chi K. Lam, J. S. Malik Peiris,  
386 Yingying Qin (The University of Hong Kong); Min Levine, Brett Whitaker (United States  
387 CDC); William Campbell (Abt Associates); Yu Xia, Xuerong Ya, Zefeng Dong (Suzhou CDC);  
388 Jinjin Shen, Renjie Jiang, Yao Wang, Yuhong Chen (Yancheng CDC); Yuelong Shu, Luzhao  
389 Feng, Jiandong Zheng (China CDC); Weijun Wan (Dongqiao Health Center of Huangdai Town,  
390 Xiangcheng District, Suzhou); Hongbo Gu (Healthcare Center of Shishan Street Community,

391 New District, Suzhou); Jinhua Shen (Xiangcheng No. 2 People's Hospital, Suzhou); Wenjing  
392 Wang (Xiangcheng District Center for Disease Prevention and Control, Suzhou); Risheng Zha  
393 (New District Center for Disease Prevention and Control, Suzhou); Liwen Gao (Xiangcheng  
394 District Health Commission, Suzhou).

395

396 The authors would like to thank Eduardo Azziz-Baumgartner, Steve Lindstrom and Jerome  
397 Tokars (US CDC) for helpful comments; and Qian Xiong, Hau Chi So, Chi Kin Lam (HKU);  
398 Jing Xu (Yancheng CDC); Yuhua Chen, Maogan Wu and Lijuan Wu (Yongfeng Health Center  
399 of Tinghu District, Yancheng); Jianhong Wang (Bufeng Health Center of the Economic  
400 Development Zone, Yancheng); Ran An (Department of Clinical Laboratory, Yancheng CDC);  
401 and other healthcare personnel and colleagues from the Department of Clinical Laboratory,  
402 Suzhou CDC; Dongqiao Health Center of Huangdai Town, Xiangcheng District, Suzhou;  
403 Healthcare Center of Shishan Street Community, New District, Suzhou; Xiangcheng No. 2  
404 People's Hospital, Suzhou; Xiangcheng District CDC, Suzhou; New District CDC, Suzhou; and  
405 Xiangcheng District Health Commission, Suzhou for technical support in the study.

406

407 The findings and conclusions in this report are those of the authors and do not necessarily  
408 represent the official position of the U.S. Centers for Disease Control and Prevention or the U.S.  
409 Public Health Service.

410

#### 411 **DECLARATION OF INTERESTS**

412 BJC has consulted for AstraZeneca, Fosun Pharma, GSK, Haleon, Moderna, Novavax, Pfizer,  
413 Roche, and Sanofi Pasteur. The authors report no other potential conflicts of interest.

414 **REFERENCES**

- 415 1. Moriyama M, Hugentobler WJ, Iwasaki A. Seasonality of Respiratory Viral Infections.  
416 *Annu Rev Virol* 2020; **7**(1): 83-101.
- 417 2. Iuliano AD, Roguski KM, Chang HH, et al. Estimates of global seasonal influenza-  
418 associated respiratory mortality: a modelling study. *Lancet* 2018; **391**(10127): 1285-300.
- 419 3. Ackerson B, Tseng HF, Sy LS, et al. Severe Morbidity and Mortality Associated With  
420 Respiratory Syncytial Virus Versus Influenza Infection in Hospitalized Older Adults. *Clin Infect*  
421 *Dis* 2019; **69**(2): 197-203.
- 422 4. Palache A, Oriol-Mathieu V, Fino M, Xydia-Charmantana M, Influenza Vaccine Supply  
423 task f. Seasonal influenza vaccine dose distribution in 195 countries (2004-2013): Little progress  
424 in estimated global vaccination coverage. *Vaccine* 2015; **33**(42): 5598-605.
- 425 5. Mazur NI, Terstappen J, Baral R, et al. Respiratory syncytial virus prevention within  
426 reach: the vaccine and monoclonal antibody landscape. *Lancet Infect Dis* 2023; **23**(1): e2-e21.
- 427 6. Monto AS, Koopman JS, Bryan ER. The Tecumseh Study of Illness. XIV. Occurrence of  
428 respiratory viruses, 1976-1981. *Am J Epidemiol* 1986; **124**(3): 359-67.
- 429 7. Nicholson KG, Kent J, Hammersley V, Cancio E. Acute viral infections of upper  
430 respiratory tract in elderly people living in the community: comparative, prospective, population  
431 based study of disease burden. *BMJ* 1997; **315**(7115): 1060-4.
- 432 8. Falsey AR, Hennessey PA, Formica MA, Cox C, Walsh EE. Respiratory syncytial virus  
433 infection in elderly and high-risk adults. *N Engl J Med* 2005; **352**(17): 1749-59.
- 434 9. Xu C, Liu L, Ren B, et al. Incidence of influenza virus infections confirmed by serology  
435 in children and adult in a suburb community, northern China, 2018-2019 influenza season.  
436 *Influenza Other Respir Viruses* 2020; **15**(2): 262-9.

- 437 10. Geismar C, Nguyen V, Fragaszy E, et al. Symptom profiles of community cases infected  
438 by influenza, RSV, rhinovirus, seasonal coronavirus, and SARS-CoV-2 variants of concern. *Sci*  
439 *Rep* 2023; **13**(1).
- 440 11. Hall CE, Cooney MK, Fox JP. The Seattle virus watch. IV. Comparative epidemiologic  
441 observations of infections with influenza A and B viruses, 1965-1969, in families with young  
442 children. *Am J Epidemiol* 1973; **98**(5): 365-80.
- 443 12. Fowler KB, Gupta V, Sullender W, et al. Incidence of symptomatic A(H1N1)pdm09  
444 influenza during the pandemic and post-pandemic periods in a rural Indian community. *Int J*  
445 *Infect Dis* 2013; **17**(12): e1182-5.
- 446 13. Cowling BJ, Perera RA, Fang VJ, et al. Incidence of influenza virus infections in children  
447 in Hong Kong in a 3-year randomized placebo-controlled vaccine study, 2009-2012. *Clin Infect*  
448 *Dis* 2014; **59**(4): 517-24.
- 449 14. Nguyen-Van-Tam JS, O'Leary M, Martin ET, et al. Burden of respiratory syncytial virus  
450 infection in older and high-risk adults: a systematic review and meta-analysis of the evidence  
451 from developed countries. *Eur Respir Rev* 2022; **31**(166).
- 452 15. Prasert K, Patumanond J, Praphasiri P, et al. Effectiveness of trivalent inactivated  
453 influenza vaccine among community-dwelling older adults in Thailand: A two-year prospective  
454 cohort study. *Vaccine* 2019; **37**(6): 783-91.
- 455 16. Praphasiri P, Shrestha M, Patumanond J, et al. Underlying cardiopulmonary conditions as  
456 a risk factor for influenza and respiratory syncytial virus infection among community-dwelling  
457 adults aged  $\geq 65$  years in Thailand: Findings from a two-year prospective cohort study.  
458 *Influenza Other Respir Viruses* 2021; **15**(5): 634-40.

- 459 17. Tinoco YO, Azziz-Baumgartner E, Uyeki TM, et al. Burden of Influenza in 4  
460 Ecologically Distinct Regions of Peru: Household Active Surveillance of a Community Cohort,  
461 2009-2015. *Clin Infect Dis* 2017; **65**(9): 1532-41.
- 462 18. Cohen C, Kleynhans J, Moyes J, et al. Asymptomatic transmission and high community  
463 burden of seasonal influenza in an urban and a rural community in South Africa, 2017-18  
464 (PHIRST): a population cohort study. *Lancet Glob Health* 2021; **9**(6): e863-e74.
- 465 19. Cowling BJ, Xu C, Tang F, et al. Cohort profile: the China Ageing REspiratory  
466 infections Study (CARES), a prospective cohort study in older adults in Eastern China. *BMJ*  
467 *Open* 2017; **7**(10): e017503.
- 468 20. Idler EL, Benyamini Y. Self-rated health and mortality: a review of twenty-seven  
469 community studies. *J Health Soc Behav* 1997; **38**(1): 21-37.
- 470 21. Borson S, Scanlan J, Brush M, Vitaliano P, Dokmak A. The mini-cog: a cognitive 'vital  
471 signs' measure for dementia screening in multi-lingual elderly. *Int J Geriatr Psychiatry* 2000;  
472 **15**(11): 1021-7.
- 473 22. Molloy DW, Alemayehu E, Roberts R. Reliability of a Standardized Mini-Mental State  
474 Examination compared with the traditional Mini-Mental State Examination. *Am J Psychiatry*  
475 1991; **148**(1): 102-5.
- 476 23. Yu H, Alonso WJ, Feng L, et al. Characterization of regional influenza seasonality  
477 patterns in China and implications for vaccination strategies: spatio-temporal modeling of  
478 surveillance data. *PLoS Med* 2013; **10**(11): e1001552.
- 479 24. Hanley JA, Lippman-Hand A. If nothing goes wrong, is everything all right? Interpreting  
480 zero numerators. *JAMA* 1983; **249**(13): 1743-5.

- 481 25. Sun S, Chen J, Johannesson M, et al. Population health status in China: EQ-5D results, by  
482 age, sex and socio-economic status, from the National Health Services Survey 2008. *Qual Life*  
483 *Res* 2011; **20**(3): 309-20.
- 484 26. Henkle E, Irving SA, Naleway AL, et al. Comparison of laboratory-confirmed influenza  
485 and noninfluenza acute respiratory illness in healthcare personnel during the 2010-2011  
486 influenza season. *Infect Control Hosp Epidemiol* 2014; **35**(5): 538-46.
- 487 27. University of California. Global Administrative Areas. 2019. <https://gadm.org/> (accessed  
488 October 21 2019).
- 489 28. Korsten K, Adriaenssens N, Coenen S, et al. Burden of respiratory syncytial virus  
490 infection in community-dwelling older adults in Europe (RESCEU): an international prospective  
491 cohort study. *Eur Respir J* 2021; **57**(4).
- 492 29. Kurai D, Natori M, Yamada M, Zheng R, Saito Y, Takahashi H. Occurrence and disease  
493 burden of respiratory syncytial virus and other respiratory pathogens in adults aged  $\geq 65$  years in  
494 community: A prospective cohort study in Japan. *Influenza Other Respir Viruses* 2021; **16**(2):  
495 298-307.
- 496 30. Song Y, Han Z, Song K, Zhen T. Antibiotic Consumption Trends in China: Evidence  
497 From Six-Year Surveillance Sales Records in Shandong Province. *Front Pharmacol* 2020; **11**.  
498

499 **Tables**

500 **Table 1. Demographic characteristics at enrolment of an older adult cohort in the cities of Suzhou and**  
 501 **Yancheng, Jiangsu Province, China.**

|                                                                | Age (years)        |                    |                    | Overall<br>(N=1527) |
|----------------------------------------------------------------|--------------------|--------------------|--------------------|---------------------|
|                                                                | 60 - 69<br>(N=547) | 70 - 79<br>(N=515) | 80 - 89<br>(N=465) |                     |
|                                                                | n (%)              | n (%)              | n (%)              | n (%)               |
| <b>Socio-demographics at enrollment</b>                        |                    |                    |                    |                     |
| <b>Female</b>                                                  | 293 (54)           | 277 (54)           | 280 (60)           | 850 (56)            |
| <b>City</b>                                                    |                    |                    |                    |                     |
| Suzhou                                                         | 293 (54)           | 262 (51)           | 213 (46)           | 768 (50)            |
| Yancheng                                                       | 254 (46)           | 253 (49)           | 252 (54)           | 759 (50)            |
| <b>Education</b>                                               |                    |                    |                    |                     |
| No schooling                                                   | 200 (37)           | 245 (48)           | 330 (71)           | 775 (51)            |
| Primary school                                                 | 242 (44)           | 179 (35)           | 98 (21)            | 519 (34)            |
| Secondary school or above                                      | 105 (19)           | 91 (18)            | 37 (8)             | 233 (15)            |
| <b>Annual personal income (RMB\$)<sup>1</sup></b>              |                    |                    |                    |                     |
| <10,000                                                        | 297 (54)           | 372 (72)           | 353 (76)           | 1022 (67)           |
| 10,000 to <30,000                                              | 174 (32)           | 84 (16)            | 60 (13)            | 318 (21)            |
| >30,000                                                        | 49 (9)             | 35 (7)             | 25 (5)             | 109 (7)             |
| <b>Residence<sup>2</sup></b>                                   |                    |                    |                    |                     |
| Urban                                                          | 126 (23)           | 135 (26)           | 113 (24)           | 374 (24)            |
| Semi-urban                                                     | 255 (47)           | 212 (41)           | 184 (40)           | 651 (43)            |
| Rural                                                          | 166 (30)           | 168 (33)           | 168 (36)           | 502 (33)            |
| <b>Household</b>                                               |                    |                    |                    |                     |
| Household size, mean (SD)                                      | 3.1 (1.6)          | 2.7 (1.6)          | 2.6 (1.6)          | 2.8 (1.6)           |
| With at least one child ≤5y                                    | 41 (7)             | 27 (5)             | 37 (8)             | 105 (7)             |
| <b>Self-reported health-related information at enrollment</b>  |                    |                    |                    |                     |
| <b>Health status</b>                                           |                    |                    |                    |                     |
| Excellent                                                      | 18 (3)             | 8 (2)              | 1 (0)              | 27 (2)              |
| Very good                                                      | 148 (27)           | 98 (19)            | 69 (15)            | 315 (20)            |
| Good                                                           | 222 (41)           | 180 (35)           | 177 (38)           | 579 (38)            |
| Fair                                                           | 150 (27)           | 210 (41)           | 192 (41)           | 552 (36)            |
| Poor                                                           | 9 (2)              | 19 (4)             | 26 (6)             | 54 (4)              |
| <b>Chronic medical conditions<sup>3</sup></b>                  |                    |                    |                    |                     |
| Any                                                            | 343 (63)           | 380 (74)           | 327 (70)           | 1050 (69)           |
| Cardiovascular diseases                                        | 236 (43)           | 303 (59)           | 248 (53)           | 787 (52)            |
| Lung diseases                                                  | 45 (8)             | 50 (10)            | 56 (12)            | 151 (10)            |
| Diabetes                                                       | 44 (8)             | 56 (11)            | 29 (6)             | 129 (8)             |
| <b>Cognitive function – Mini-Cog 3-item recall<sup>4</sup></b> |                    |                    |                    |                     |
| 3 items                                                        | 533 (97)           | 507 (98)           | 457 (98)           | 1497 (98)           |
| 2 items & Completed clock drawing test                         | 9 (2)              | 6 (1)              | 6 (1)              | 21 (1)              |
| 1 item & Completed clock drawing test                          | 5 (1)              | 2 (0)              | 2 (0)              | 9 (1)               |
| <b>Cognitive function – SMMSE<sup>5</sup></b>                  |                    |                    |                    |                     |
| Normal (30 – 26)                                               | 346 (63)           | 259 (50)           | 141 (30)           | 746 (49)            |
| Mild cognitive impairment (25 – 20)                            | 178 (33)           | 211 (41)           | 241 (52)           | 630 (41)            |
| Moderate cognitive impairment (19 – 10)                        | 14 (3)             | 40 (8)             | 75 (16)            | 129 (8)             |
| <b>Smoking</b>                                                 |                    |                    |                    |                     |
| Never smoked                                                   | 330 (60)           | 327 (63)           | 323 (69)           | 980 (64)            |
| Past smoker                                                    | 37 (7)             | 55 (11)            | 34 (7)             | 126 (8)             |
| Current smoker                                                 | 171 (31)           | 127 (25)           | 101 (22)           | 399 (26)            |
| <b>Ever received influenza vaccine</b>                         | 1 (0.2)            | 3 (0.6)            | 2 (0.4)            | 6 (0.4)             |
| <b>Hospitalizations in past two years prior to enrollment</b>  | 57 (10)            | 93 (18)            | 86 (18)            | 236 (15)            |

502 1 US\$1=RMB\$6.7  
 503 2 Urban residents are defined as those who live and work in cities/ towns, while rural residents as those who live in villages and farm for their  
 504 livelihood. Semi-urban refers to areas in a transitional stage towards urbanization.  
 505 3 Any chronic medical conditions included cardiovascular diseases, lung diseases, diabetes, kidney disease (excluding kidney stones, bladder  
 506 infection or incontinence), liver disease (including chronic hepatitis), cancer, depression or anxiety disorder, neurologic disorder (such as epilepsy,  
 507 any seizure disorder or Parkinson’s disease), osteoarthritis, autoimmune disease (such as lupus or rheumatoid arthritis), and any other health  
 508 problem or condition. In particular, *cardiovascular diseases* included heart problems (such as heart attack, congestive failure, angina, or coronary

509 heart disease), hypertension and stroke. *Lung diseases* included asthma, chronic obstructive pulmonary disease (COPD), emphysema, chronic  
510 bronchitis, or any other chronic lung disease.  
511 4 The 3-item recall in the Mini-Cog tool, i.e. the number of words recalled after a several-minute delay and distraction, out of three words.  
512 5 SMMSE: Standardized Mini-Mental State Examination.  
513



514 **Table 2. Proportion of participants with acute respiratory illness (ARI), medically attended ARI, ARI-**  
 515 **associated hospitalization and death by age group.**

|                                                                         | Age (years) |           |           |            |
|-------------------------------------------------------------------------|-------------|-----------|-----------|------------|
|                                                                         | 60 - 69     | 70 - 79   | 80 - 89   | Overall    |
|                                                                         | (N=547)     | (N=515)   | (N=465)   | (N=1527)   |
|                                                                         | n (%)       | n (%)     | n (%)     | n (%)      |
| <b>Participants followed<sup>1</sup></b>                                |             |           |           |            |
| <b>Participants at start each study year</b>                            |             |           |           |            |
| Year 1                                                                  | 547 (100)   | 515 (100) | 465 (100) | 1527 (100) |
| Year 2                                                                  | 524 (96)    | 500 (97)  | 446 (96)  | 1470 (96)  |
| <b>Acute respiratory illness and medical care</b>                       |             |           |           |            |
| <b>Acute respiratory illness (ARI)</b>                                  |             |           |           |            |
| Participants with one ARI episode only                                  | 100 (18)    | 111 (22)  | 87 (19)   | 298 (20)   |
| Participants with two or more ARI episodes                              | 86 (16)     | 86 (17)   | 52 (11)   | 224 (15)   |
| Participants with one influenza ARI episode only                        | 34 (6.2)    | 36 (7.0)  | 21 (4.5)  | 91 (6)     |
| Participants with two or more influenza ARI episodes                    | 1 (0.2)     | 1 (0.2)   | 0 (0)     | 2 (0.1)    |
| Participants with one RSV ARI episode only                              | 8 (1.5)     | 8 (1.6)   | 6 (1.3)   | 22 (1.4)   |
| <b>Medically attended ARI<sup>2</sup></b>                               |             |           |           |            |
| Participants with one medically attended ARI episode only               | 93 (17)     | 97 (19)   | 67 (14)   | 257 (17)   |
| Participants with two or more medically attended ARI episodes           | 53 (10)     | 42 (8)    | 34 (7)    | 129 (8)    |
| Participants with one medically attended influenza ARI episode only     | 33 (6)      | 30 (5.8)  | 13 (2.8)  | 76 (5)     |
| Participants with two or more medically attended influenza ARI episodes | 0 (0)       | 1 (0.2)   | 0 (0)     | 1 (0.1)    |
| Participants with one medically attended RSV ARI episode only           | 5 (0.9)     | 4 (0.8)   | 3 (0.6)   | 12 (0.8)   |
| <b>ARI-associated hospitalization<sup>3</sup></b>                       |             |           |           |            |
| Participants with one hospitalization only                              | 5 (0.9)     | 8 (1.6)   | 13 (2.8)  | 26 (1.7)   |
| Participants with one hospitalization with influenza ARI only           | 3 (0.5)     | 1 (0.2)   | 0 (0)     | 4 (0.3)    |
| Participants with one hospitalization with RSV ARI only                 | 0 (0)       | 1 (0.2)   | 0 (0)     | 1 (0.1)    |
| <b>Death within 14 days of ARI symptom onset<sup>4</sup></b>            |             |           |           |            |
| Deaths                                                                  | 0 (0)       | 1 (0.2)   | 0 (0)     | 1 (0.1)    |
| Deaths with influenza                                                   | 0 (0)       | 0 (0)     | 0 (0)     | 0 (0)      |
| Deaths with RSV                                                         | 0 (0)       | 1 (0.2)   | 0 (0)     | 1 (0.1)    |

1 All participants were enrolled at the start of the study with no replenishment. Year 1: 27 December 2015 - 3 September 2016; Year 2: 4 September 2016 - 2 September 2017.

2 A medically attended ARI episode is defined as an ARI with a self-reported medical visit to a doctor or other medical professional for this illness including outpatient medical clinic/offices, emergency rooms or was hospitalized, reported during the acute illness.

3 An ARI-associated hospitalization is defined as an ARI with a self-reported hospitalization, reported during the acute illness.

4 One death during ARI with PCR-confirmed RSV infection but this case was not hospitalized.

516  
 517  
 518  
 519  
 520  
 521  
 522

523 **Table 3. Cumulative incidence of PCR-confirmed influenza ARI, PCR-confirmed RSV ARI, influenza ARI-**  
 524 **associated hospitalization and RSV ARI-associated hospitalization.**

| Age (years)                                         | Cumulative incidence (%; 95% confidence interval) |                   |                   |                                 |
|-----------------------------------------------------|---------------------------------------------------|-------------------|-------------------|---------------------------------|
|                                                     | 60 - 69                                           | 70 - 79           | 80 - 89           | Overall (weighted) <sup>6</sup> |
| <b>Year 1 (27 December 2015 - 3 September 2016)</b> |                                                   |                   |                   |                                 |
| <b>ARI<sup>1</sup></b>                              | 26.9 (21.9, 32.5)                                 | 23.9 (19.4, 28.7) | 16.1 (12.5, 20.0) | 24.1 (20.7, 27.9)               |
| <b>ILI<sup>2</sup></b>                              | 3.8 (2.0, 5.9)                                    | 3.3 (1.7, 5.2)    | 3.4 (1.7, 5.2)    | 3.6 (2.4, 5.0)                  |
| <b>PCR-confirmed influenza ARI</b>                  |                                                   |                   |                   |                                 |
| All                                                 | 1.1 (0.4, 2.0)                                    | 0.4 (0, 1.0)      | 0.4 (0, 1.1)      | 0.8 (0.3, 1.4)                  |
| Medically attended <sup>3</sup>                     | 1.1 (0.4, 2.0)                                    | 0.2 (0, 0.6)      | 0.2 (0, 0.6)      | 0.7 (0.2, 1.3)                  |
| Hospitalized <sup>4</sup>                           | 0.2 (0, 0.7)                                      | 0 (0, 0.6)        | 0 (0, 0.6)        | 0.1 (0, 0.3)                    |
| <b>PCR-confirmed RSV ARI</b>                        |                                                   |                   |                   |                                 |
| All                                                 | 0.5 (0, 1.3)                                      | 0.6 (0, 1.4)      | 0.2 (0, 0.6)      | 0.5 (0.1, 1.0)                  |
| Medically attended                                  | 0.4 (0, 0.9)                                      | 0.2 (0, 0.6)      | 0 (0, 0.6)        | 0.3 (0, 0.7)                    |
| Hospitalized <sup>5</sup>                           | 0 (0, 0.5)                                        | 0 (0, 0.6)        | 0 (0, 0.6)        | 0 (0, 0.2)                      |
| <b>Year 2 (4 September 2016 - 2 September 2017)</b> |                                                   |                   |                   |                                 |
| <b>ARI</b>                                          | 38.7 (32.4, 45.4)                                 | 42.0 (35.8, 48.4) | 30.7 (25.3, 37.0) | 39.2 (34.6, 44.5)               |
| <b>ILI</b>                                          | 5.7 (3.8, 7.8)                                    | 6.8 (4.4, 9.4)    | 4.9 (2.9, 7.4)    | 5.9 (4.6, 7.5)                  |
| <b>PCR-confirmed influenza ARI</b>                  |                                                   |                   |                   |                                 |
| All                                                 | 5.7 (3.8, 7.8)                                    | 7.0 (5.0, 9.4)    | 4.3 (2.5, 6.3)    | 6.1 (4.7, 7.7)                  |
| Medically attended                                  | 5.2 (3.4, 7.1)                                    | 6.2 (4.2, 8.6)    | 2.7 (1.3, 4.3)    | 5.3 (4.1, 6.9)                  |
| Hospitalized                                        | 0.4 (0, 1.0)                                      | 0.2 (0, 0.6)      | 0 (0, 0.7)        | 0.3 (0, 0.8)                    |
| <b>PCR-confirmed RSV ARI</b>                        |                                                   |                   |                   |                                 |
| All                                                 | 1.0 (0.2, 1.9)                                    | 1.0 (0.2, 2.0)    | 1.1 (0.2, 2.2)    | 1.0 (0.5, 1.6)                  |
| Medically attended                                  | 0.6 (0, 1.3)                                      | 0.6 (0, 1.4)      | 0.7 (0, 1.6)      | 0.6 (0.2, 1.1)                  |
| Hospitalized                                        | 0 (0, 0.6)                                        | 0.2 (0, 0.6)      | 0 (0, 0.7)        | 0.1 (0, 0.2)                    |

525 1 Acute respiratory illness (ARI) is defined as an acute onset of  $\geq 2$  of the following symptoms in the past 7 days: fever (self-reported  
 526 feverishness, chills, or temperature  $\geq 37.8^\circ\text{C}$ ), cough, sore throat, runny nose or nasal congestion, headache, myalgia (body or muscle aches and  
 527 pain), or worsened shortness of breath.

528 2 Influenza-like illness (ILI) is defined as an ARI with measured fever of  $\geq 37.8^\circ\text{C}$  (self-reported and/or measured by study staff) plus cough.

529 3 Medically attended ARI is defined as an ARI with a self-reported medical visit to a doctor or other medical professional during the acute  
 530 illness, including visits to outpatient medical clinic/offices, emergency rooms, or hospitals.

531 4 ARI-associated hospitalization is defined as a self-reported hospitalization (i.e. staying in the hospital for at least one night as a patient) during  
 532 an ARI.

533 5 There were no hospitalizations with PCR-confirmed RSV infections.

534 6 The cumulative incidence for each age group was unweighted, while the overall cumulative incidence was weighted with the population age  
 535 and sex structure of Jiangsu province, China.  
 536

537 **Table 4. Illness duration, health and functioning, medical care and medication use in PCR-confirmed**  
 538 **influenza ARI and RSV ARI.**

|                                                 | Acute respiratory illness (ARI) episodes |                  |                             |                               |                       |                      | PCR-confirmed influenza vs. RSV ARI |
|-------------------------------------------------|------------------------------------------|------------------|-----------------------------|-------------------------------|-----------------------|----------------------|-------------------------------------|
|                                                 | All ARI                                  | PCR negative ARI | PCR-confirmed influenza ARI |                               | PCR-confirmed RSV ARI |                      |                                     |
|                                                 | (N=822)                                  | (N=705)          | (N=93)                      |                               | (N=20)                |                      |                                     |
|                                                 | n (%)                                    | n (%)            | n (%)                       | P-value <sup>6</sup>          | n (%)                 | P-value <sup>7</sup> | P-value <sup>8</sup>                |
| <b>Symptom</b>                                  |                                          |                  |                             |                               |                       |                      |                                     |
| <b>Upper respiratory</b>                        |                                          |                  |                             |                               |                       |                      |                                     |
| Sore throat                                     | 500 (61)                                 | 430 (61)         | 55 (59)                     | 0.65                          | 15 (75)               | 0.31                 | 0.27                                |
| Runny nose or nasal congestion                  | 738 (90)                                 | 636 (90)         | 80 (86)                     | 0.27                          | 18 (90)               | >0.99                | 0.69                                |
| <b>Lower respiratory</b>                        |                                          |                  |                             |                               |                       |                      |                                     |
| Cough                                           | 787 (96)                                 | 678 (96)         | 89 (96)                     | 0.77                          | 20 (100)              | >0.99                | >0.99                               |
| Worsened shortness of breath                    | 138 (17)                                 | 117 (17)         | 17 (18)                     | 0.76                          | 4 (20)                | 0.74                 | >0.99                               |
| <b>Systemic</b>                                 |                                          |                  |                             |                               |                       |                      |                                     |
| Fever                                           | 490 (60)                                 | 413 (59)         | 63 (68)                     | 0.14                          | 11 (55)               | 0.61                 | 0.26                                |
| Feverish                                        | 368 (45)                                 | 307 (44)         | 51 (55)                     | <b>0.04</b>                   | 6 (30)                | 0.20                 | <b>0.03</b>                         |
| Chills                                          | 317 (39)                                 | 266 (38)         | 43 (46)                     | 0.13                          | 7 (35)                | 0.80                 | 0.41                                |
| Measured temperature $\geq$ 37.8°C              | 147 (18)                                 | 119 (17)         | 23 (25)                     | <b>0.04</b>                   | 3 (15)                | >0.99                | 0.33                                |
| Myalgia (Body or muscle aches and pain)         | 290 (35)                                 | 242 (34)         | 37 (40)                     | 0.48                          | 11 (55)               | 0.20                 | 0.41                                |
| Headache                                        | 500 (61)                                 | 428 (61)         | 55 (59)                     | 0.82                          | 14 (70)               | 0.31                 | 0.28                                |
| <b>Case definitions</b>                         |                                          |                  |                             |                               |                       |                      |                                     |
| <b>Influenza-like illness (ILI)<sup>1</sup></b> | 139 (17)                                 | 114 (16)         | 22 (24)                     | <b>0.04</b>                   | 3 (15)                | >0.99                | 0.49                                |
| <b>Illness with any respiratory symptoms</b>    | 819 (100)                                | 703 (100)        | 93 (100)                    | >0.99                         | 20 (100)              | >0.99                | -                                   |
| Illness with any upper respiratory symptoms     | 793 (96)                                 | 683 (97)         | 88 (95)                     | 0.52                          | 18 (90)               | 0.41                 | 0.57                                |
| Illness with any lower respiratory symptoms     | 790 (96)                                 | 680 (96)         | 89 (96)                     | 0.56                          | 20 (100)              | >0.99                | >0.99                               |
| <b>Illness with any systemic symptoms</b>       | 686 (83)                                 | 585 (83)         | 80 (86)                     | 0.65                          | 17 (85)               | 0.74                 | 0.71                                |
| <b>Cognitive function</b>                       |                                          |                  |                             |                               |                       |                      |                                     |
| Recalled 3 words                                | 476 (58)                                 | 416 (59)         | 49 (53)                     | 0.30                          | 11 (55)               | 0.61                 | >0.99                               |
| <b>Medical care</b>                             |                                          |                  |                             |                               |                       |                      |                                     |
| <b>Medically attended</b>                       | 549 (67)                                 | 461 (65)         | <b>76 (82)</b>              | <b><math>\leq</math>0.01</b>  | 12 (60)               | 0.78                 | 0.08                                |
| Outpatient                                      | 525 (64)                                 | 440 (62)         | <b>74 (80)</b>              | <b><math>\leq</math>0.001</b> | 10 (50)               | 0.28                 | <b>0.01</b>                         |
| Emergency room                                  | 4 (0.5)                                  | 1 (0.1)          | 1 (1.1)                     | 0.21                          | <b>1 (5.0)</b>        | <b>0.04</b>          | 0.27                                |
| Hospitalized                                    | 22 (2.7)                                 | 17 (2.4)         | 4 (4.3)                     | 0.28                          | 1 (5.0)               | 0.32                 | 0.55                                |

**Medication use**

|                                           |          |          |                |              |                |             |      |
|-------------------------------------------|----------|----------|----------------|--------------|----------------|-------------|------|
| <b>Received any medications</b>           | 584 (71) | 490 (70) | <b>78 (84)</b> | <b>≤0·01</b> | 16 (80)        | 0·58        | 0·71 |
| Antipyretics <sup>1</sup>                 | 157 (19) | 125 (18) | <b>28 (30)</b> | <b>0·01</b>  | 4 (20)         | >0·99       | 0·39 |
| Antibiotics                               | 436 (53) | 362 (51) | <b>60 (65)</b> | <b>0·02</b>  | <b>14 (70)</b> | <b>0·04</b> | 0·37 |
| Other (incl. over-the-counter medication) | 179 (22) | 149 (21) | 27 (29)        | 0·10         | 4 (20)         | >0·99       | 0·55 |

|                                                          | Mean (95% CI)     | Mean (95% CI)     | Mean (95% CI)            | P-value <sup>3</sup> | Mean (95% CI)     | P-value <sup>4</sup> | P-value <sup>5</sup> |
|----------------------------------------------------------|-------------------|-------------------|--------------------------|----------------------|-------------------|----------------------|----------------------|
| <b>Health and activity</b>                               |                   |                   |                          |                      |                   |                      |                      |
| Self-rated overall health while ill (0-100) <sup>2</sup> | 68 (67, 68)       | 68 (67, 69)       | 67 (65, 69)              | 0·42                 | 67 (62, 72)       | 0·97                 | 0·83                 |
| Self-rated ability to function (0-100%) <sup>3</sup>     | 70 (69, 70)       | 70 (69, 71)       | 69 (66, 71)              | 0·40                 | 68 (63, 74)       | 0·84                 | 0·94                 |
| <b>Illness duration (days)</b>                           |                   |                   |                          |                      |                   |                      |                      |
| ARI                                                      | 11·2 (10·9, 11·5) | 11·0 (10·7, 11·3) | <b>12·5 (11·4, 13·8)</b> | <b>0·02</b>          | 14·1 (10·9, 18·2) | 0·15                 | 0·63                 |
| ILI                                                      | 10·5 (9·9, 11·1)  | 10·4 (9·8, 11·0)  | 10·6 (9·0, 12·3)         | 0·71                 | 10·3 (7·0, 16·0)  | 0·76                 | 0·81                 |
| Days in bed <sup>4</sup>                                 | 0·8 (0·7, 0·9)    | 0·7 (0·6, 0·8)    | <b>1·2 (0·8, 1·7)</b>    | <b>0·04</b>          | 1·4 (0·5, 2·4)    | 0·25                 | 0·88                 |
| Duration of hospitalization <sup>5</sup>                 | 7·7 (6·5, 9·0)    | 7·8 (6·4, 9·2)    | 8·8 (6·0, 10·0)          | 0·43                 | 3 (-, -)          | -                    | -                    |

539 1 Use of antipyretics was only asked from participants who reported a symptom of fever/feverish, those who did not have fever were assumed to  
540 have not taken any antipyretics.  
541 2 Self-rated health while ill described how one felt, with 0% and 100% represented respectively the worst and best health state one could  
542 imagine.  
543 3 Self-rated ability to function described how the illness had affected one's life and activities, with 0% and 100% represented respectively one  
544 was unable at all, or able to do all, activities and responsibilities as one would normally do.  
545 4 One day in bed was defined as staying in bed for at least half the day.  
546 5 Only one case of hospitalization with PCR-confirmed RSV infection, therefore significant testing cannot be performed.  
547 6 Compared between influenza virus PCR test-positive versus test-negative regardless of RSV PCR test results; p-value ≤0.05 bolded.  
548 7 Compared between RSV PCR test-positive versus test-negative regardless of influenza virus PCR test results; p-value ≤0.05 bolded.  
549 8 Compared between influenza virus PCR test-positive versus RSV PCR test-positive; p-value ≤0.05 bolded.  
550 \*Number and percent of those who recalled 3 words  
551

552 **Figures**

553 **Figure 1. (A)** CARES study sites – Yancheng and Suzhou, Jiangsu province, mainland China.  
554 Blue: Jiangsu province; Green: Yancheng city; Pink: Suzhou city. **(B)** CARES timeline including  
555 screening period, enrollment period, and active surveillance for acute respiratory illnesses (ARI).  
556 **(C)** Weekly numbers of influenza and RSV PCR-negative ARI, PCR-confirmed influenza ARI,  
557 and PCR-confirmed RSV ARI. Blue: PCR-confirmed influenza ARI; Red: PCR-confirmed RSV  
558 ARI; Grey: Influenza and RSV PCR-negative ARI; White: ARI but no respiratory specimen  
559 collected.

560  
561 **Figure 2. (A)** Proportion of reported symptoms in participants with PCR-confirmed influenza  
562 ARI (N=93), PCR-confirmed RSV ARI (N=20), or influenza and RSV PCR-negative ARI  
563 (N=708). **(B)** Mean symptom severity score for reported symptoms and symptom categories  
564 (upper respiratory, lower respiratory, or systemic symptoms) in participants with PCR-confirmed  
565 influenza ARI, PCR-confirmed RSV ARI, or influenza and RSV PCR-negative ARI. Blue: PCR-  
566 confirmed influenza ARI; Red: PCR-confirmed RSV ARI; Grey: Influenza and RSV PCR-  
567 negative ARI. \* p-value  $\leq 0.05$

568

**A**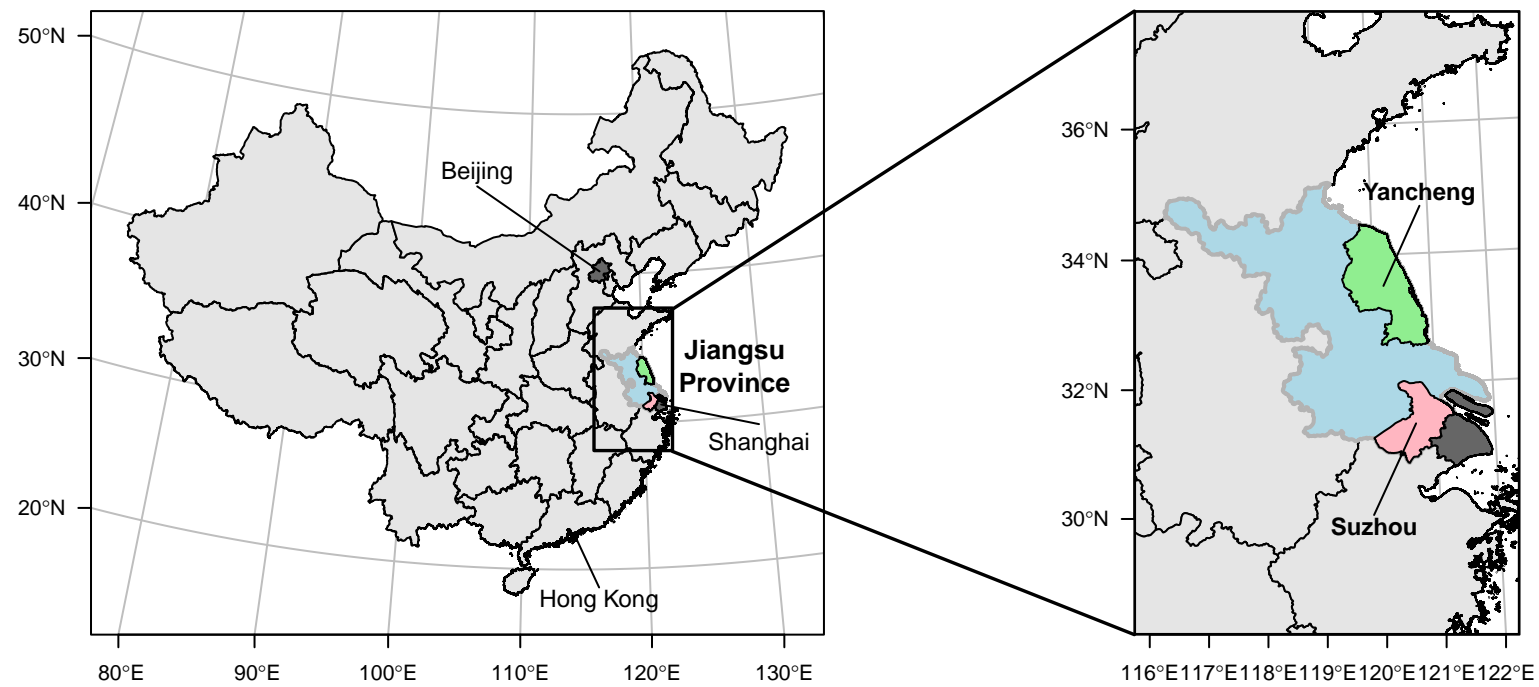**B****Study activities**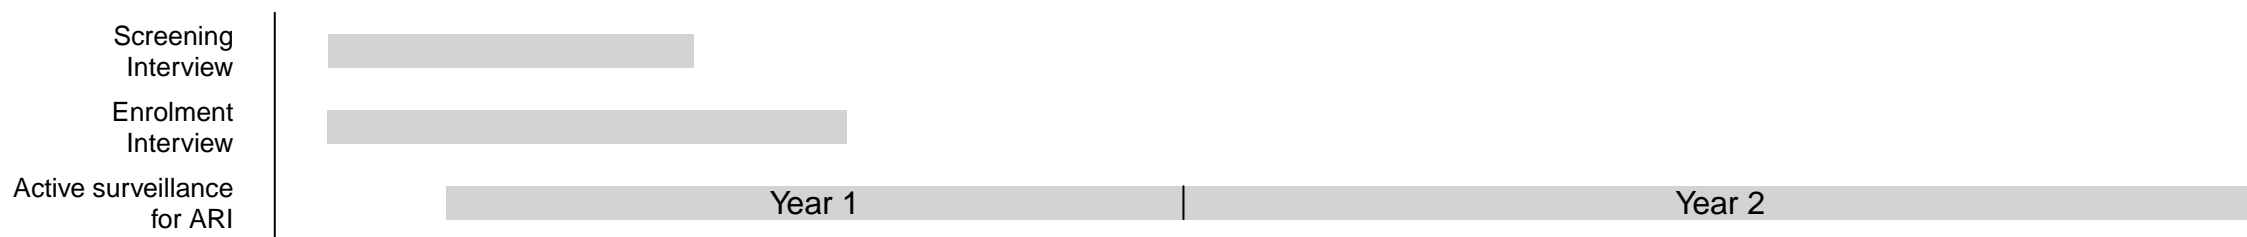**C**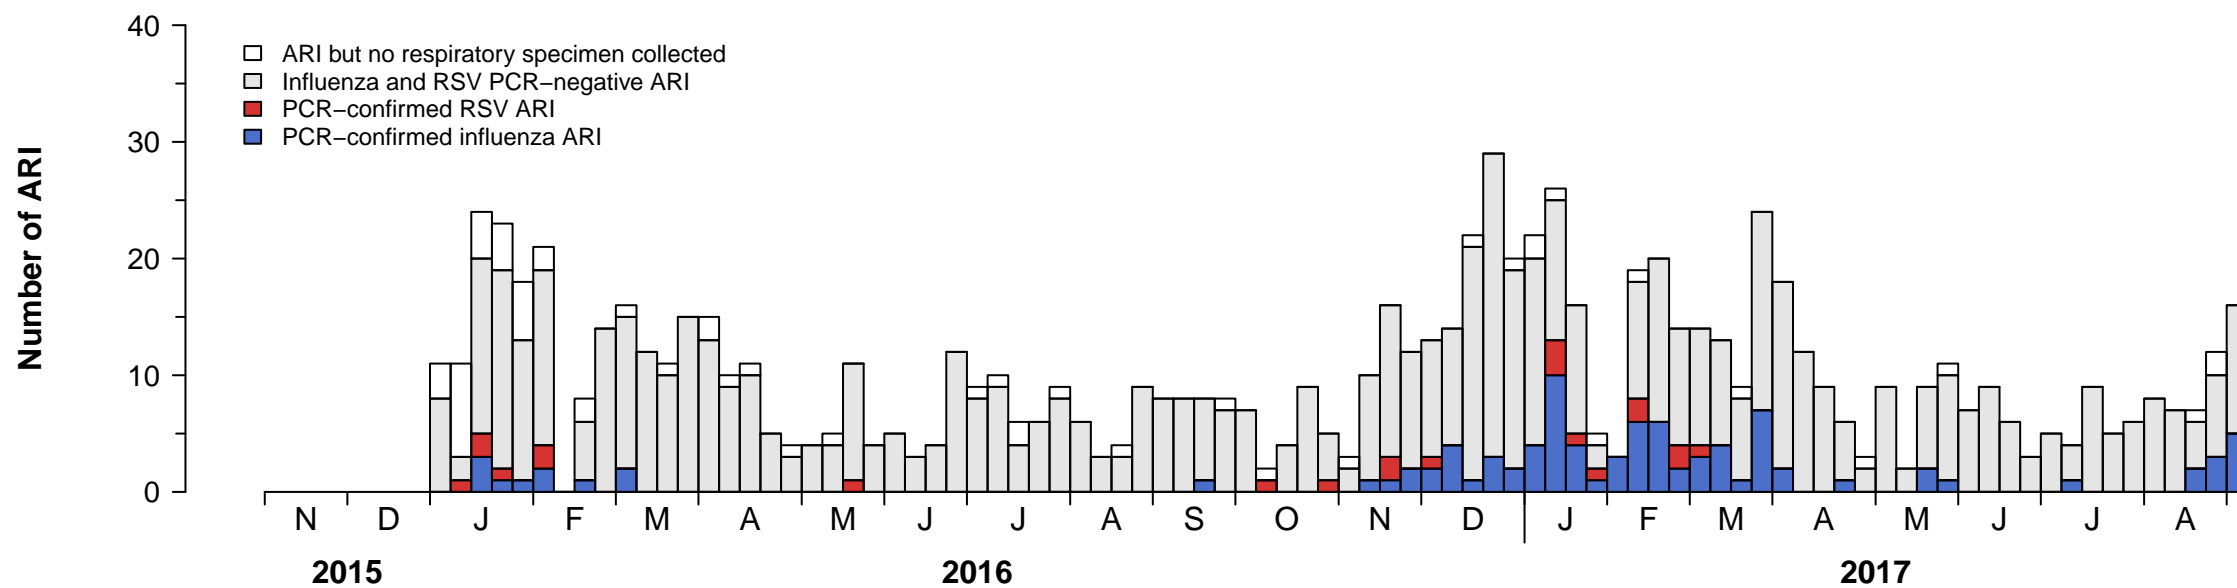

■ PCR-confirmed RSV ARI  
■ PCR-confirmed influenza ARI  
■ Influenza and RSV PCR-negative ARI

**A**

**Symptoms in influenza ARI (N = 93),  
RSV ARI (N = 20) or PCR-negative ARI (N = 708)**

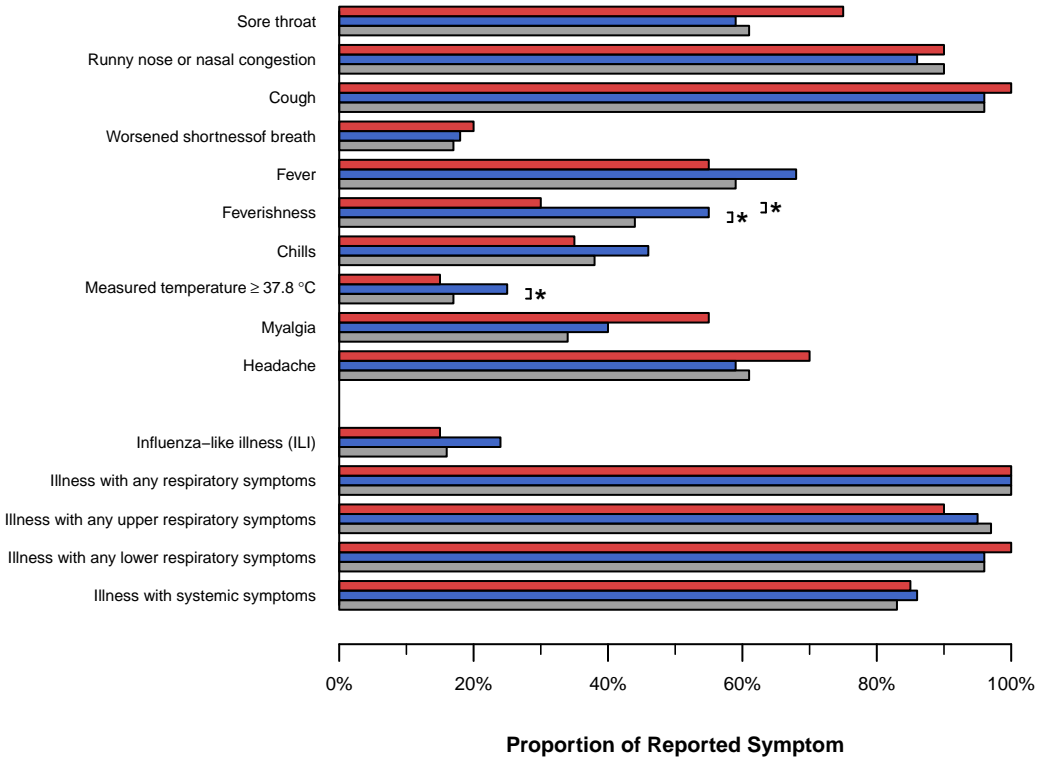

**B**

**Symptom severity score**

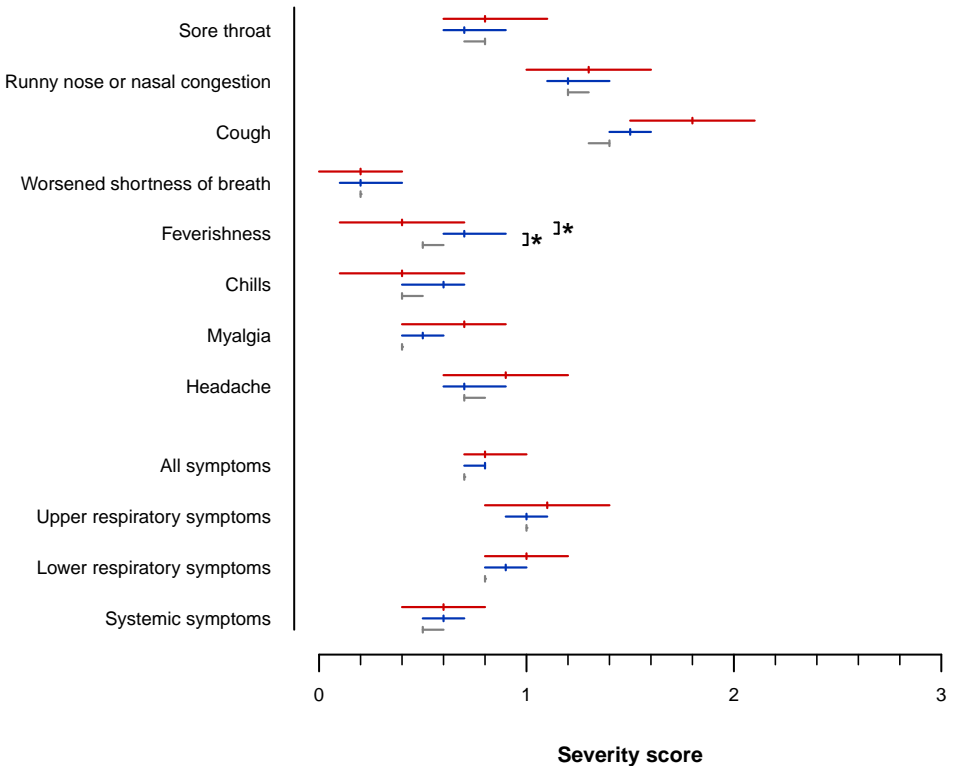

Source: https://medrxiv.org/content/10.1101/2024.07.03.24309873v1.full.pdf
